# Supplementary material for: Five types of odd–even effect and crystal structure changes brought about by ω-phenylalkyl group in [Ni(dmit)2] complex salts
Source: Royal Society of Chemistry journal article supplement (doi:10.1039/c4dt02320j), 2014-10-10
Supplement: c4dt02320j1.pdf [file c4dt02320j1.pdf]

Supporting Information

**Five Types of Odd-Even Effect and Crystal Structure Changes Brought about by  $\omega$ -Phenylalkyl Groups in  $[\text{Ni}(\text{dmit})_2]$  Complex Salts**

Masahiro Saeki, Kotaro Dai, Shuhei Ichimura, Yoshinori Tamaki,  
Kazuaki Tomono and Kazuo Miyamura

*Department of Chemical Sciences and Technology, Graduate School of Chemical Sciences and  
Technology, Tokyo University of Science,*

*1-3 Kagurazaka, Shinjuku-ku, Tokyo 162-8601, Japan*

*Department of Chemical and Biological Engineering, Ube National College of Technology, 2-14-1  
Tokiwadai, Ube-city, Yamaguchi 755-8555, Japan*

**Table S1.** Distances/ Å of S...S Interactions in (C2Ph)[Ni(dmit)<sub>2</sub>]

|                        |          |
|------------------------|----------|
| S4...S13 <sup>1)</sup> | 3.406(1) |
| S5...S13 <sup>1)</sup> | 3.604(1) |
| S18...S7 <sup>2)</sup> | 3.534(1) |

Symmetry codes; 1) x, y, 1+z; 2) -1/2+x, 1.5-y, 1-z;

Masahiro Saeki, Kotaro Dai, Shuhei Ichimura, Yoshinori Tamaki, Kazuaki Tomono, Kazuo Miyamura

**Table S2.** Distances/ Å of S...S Interactions in (C3Ph)[Ni(dmit)<sub>2</sub>]

|                         |          |
|-------------------------|----------|
| S1...S7 <sup>1)</sup>   | 3.631(2) |
| S2...S2 <sup>2)</sup>   | 3.614(2) |
| S2...S6 <sup>1)</sup>   | 3.500(3) |
| S3...S9 <sup>3)</sup>   | 3.298(2) |
| S4...S7 <sup>2)</sup>   | 3.617(2) |
| S5...S9 <sup>3)</sup>   | 3.577(2) |
| S11...S17 <sup>4)</sup> | 3.644(2) |
| S12...S16 <sup>4)</sup> | 3.474(2) |
| S11...S18 <sup>5)</sup> | 3.649(2) |
| S13...S19 <sup>6)</sup> | 3.237(2) |
| S13...S20 <sup>6)</sup> | 3.537(2) |
| S19...S19 <sup>7)</sup> | 3.310(2) |
| S19...S20 <sup>7)</sup> | 3.556(2) |

Symmetry codes; 1) 1-x, 1-y, 1-z; 2) 2-x, 1-y, 1-z; 3) x, 1+y, z; 4) 2-x, 1-y, -z; 5) 1-x, 1-y, -z; 6) x, -1+y, z; 7) 2-x, 2-y, -z;

Masahiro Saeki, Kotaro Dai, Shuhei Ichimura, Yoshinori Tamaki, Kazuaki Tomono, Kazuo Miyamura

**Table S3.** Distances/ Å of S...S Interactions in (C4Ph)[Ni(dmit)<sub>2</sub>]

|                       |          |
|-----------------------|----------|
| S3...S9 <sup>1)</sup> | 3.540(1) |
| S6...S4 <sup>2)</sup> | 3.624(1) |

Symmetry codes; 1) -1+x, y, z; 2) 1-x, -1/2+y, 1/2-z;

Masahiro Saeki, Kotaro Dai, Shuhei Ichimura, Yoshinori Tamaki, Kazuaki Tomono, Kazuo Miyamura

**Table S4.** Distances/ Å of S...S Interactions in (C5Ph)[Ni(dmit)<sub>2</sub>]

|                         |          |
|-------------------------|----------|
| S5...S15 <sup>1)</sup>  | 3.449(3) |
| S6...S19 <sup>2)</sup>  | 3.634(2) |
| S8...S19 <sup>2)</sup>  | 3.451(2) |
| S11...S16 <sup>3)</sup> | 3.642(2) |
| S11...S18 <sup>3)</sup> | 3.545(2) |
| S16...S16 <sup>3)</sup> | 3.571(3) |

Symmetry codes; 1) 1.5-x, -1/2+y, 1.5-z; 2) 1-x, -y, 1-z; 3) 2-x, -y, 2-z;

Masahiro Saeki, Kotaro Dai, Shuhei Ichimura, Yoshinori Tamaki, Kazuaki Tomono, Kazuo Miyamura
